# Supplementary material for: In situ selective N-alkylation of pendant pyridyl functionality in mixed-valence copper complexes with methanol and copper(ii) bromide
Source: Royal Society of Chemistry journal article supplement (doi:10.1039/c2dt12081j), 2012-01-01
Supplement: c2dt12081j.pdf [file c2dt12081j.pdf]

*Electronic Supplementary Information*

**In Situ Selective *N*-alkylation of Pendant Pyridyl Functionality in Mixed-Valence Copper Complexes with Methanol and Copper(II) Bromide**

Da-Qian Feng, Xiao-Ping Zhou, Ji Zheng, Guang-hui Chen, Xiao-Chun Huang, Dan Li\*

*Department of Chemistry, Shantou University, Guangdong 515063, People's Republic of China*

\* E-mail: dli@stu.edu.cn

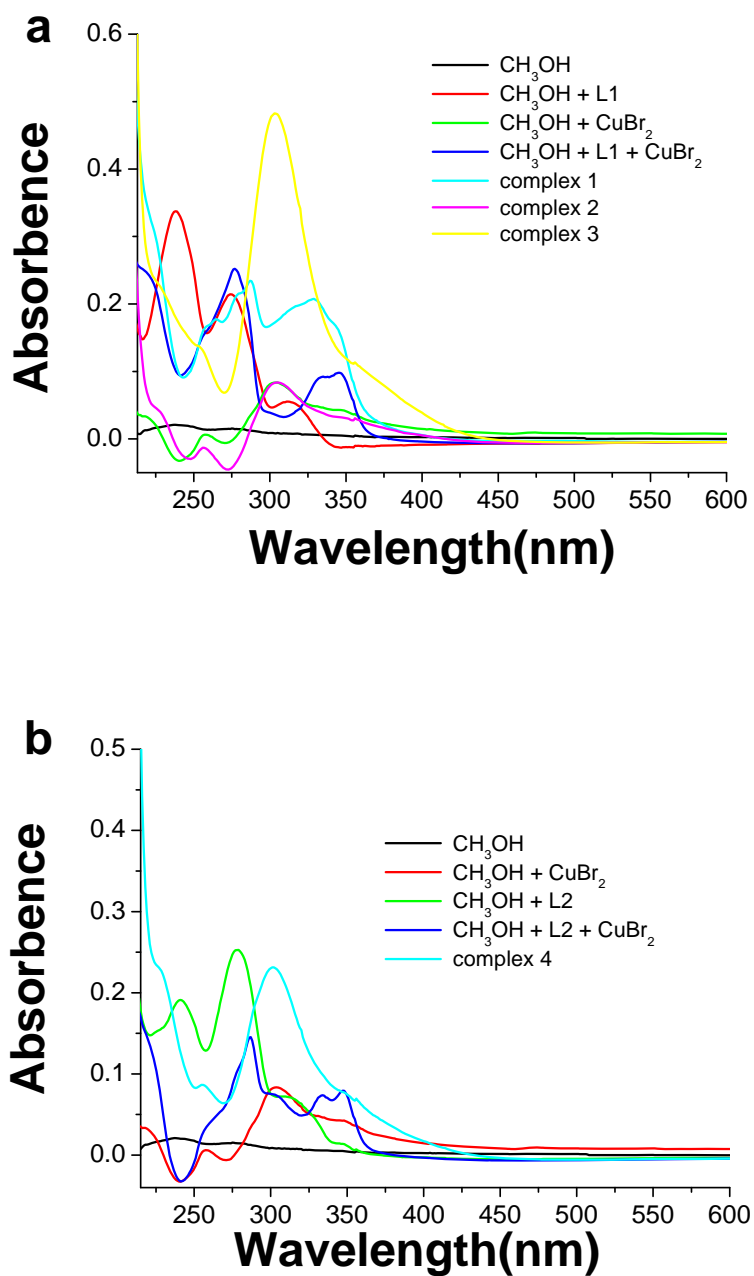

**Fig. S1.** The UV-VIS spectra of different reaction filtrates. (a) The ratio between Ligand L1 and CuBr<sub>2</sub> is 1:2 (complex 1), 1:4 (complex 2), and 1:8 (complex 3); (b) The ratio between Ligand L2 and CuBr<sub>2</sub> is 1:4 (complex 4).

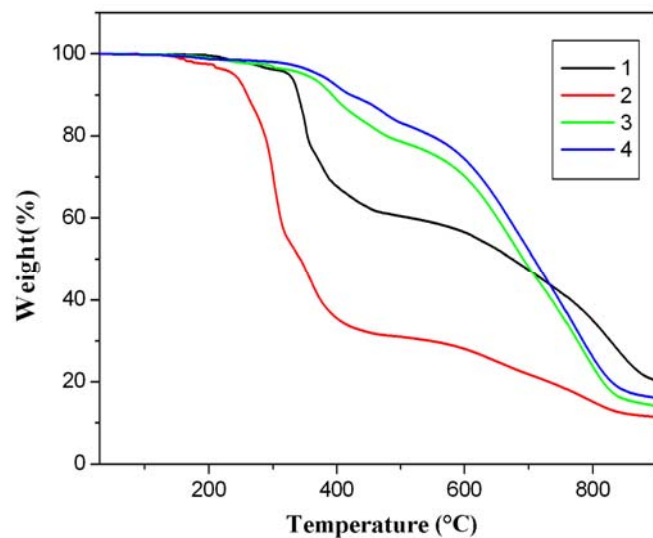

**Fig. S2.** TGA curves of complexes 1–4.

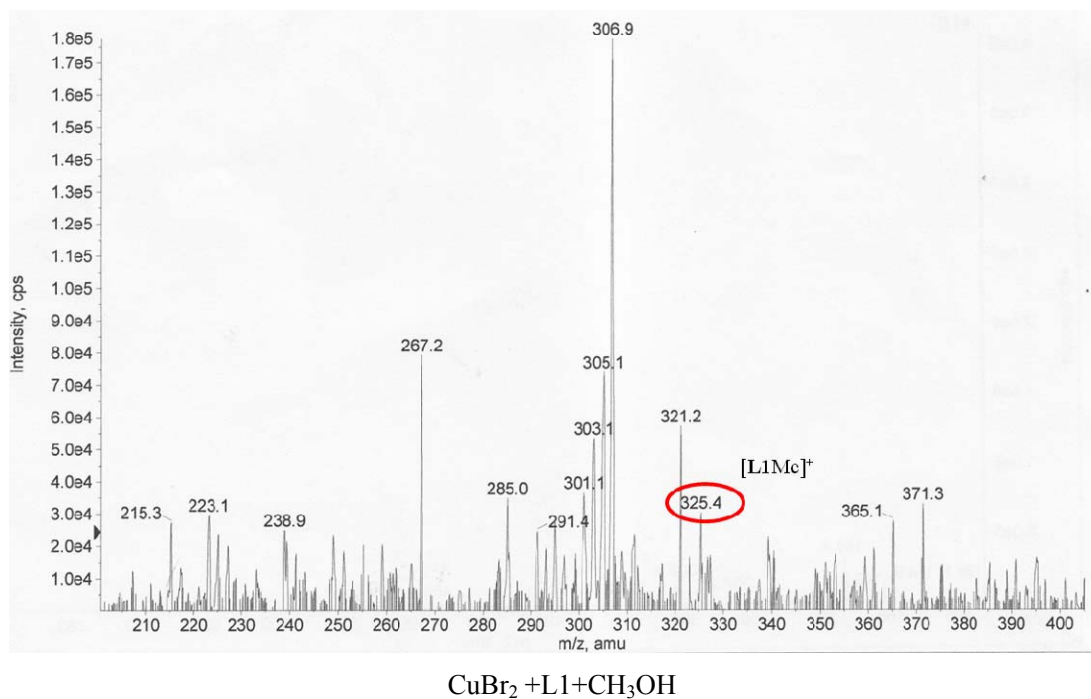

**Fig. S3.** ESI-Mass spectra of reaction filtrate of complex 1.

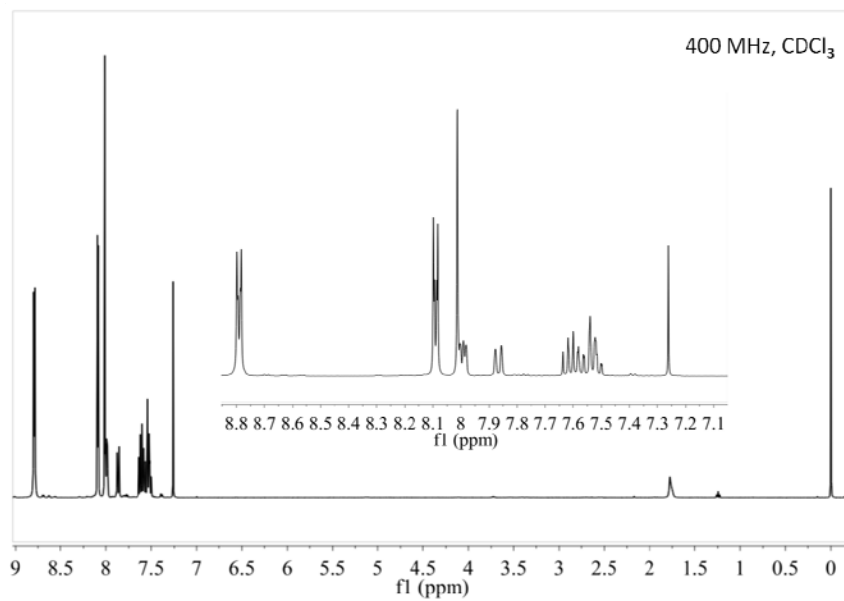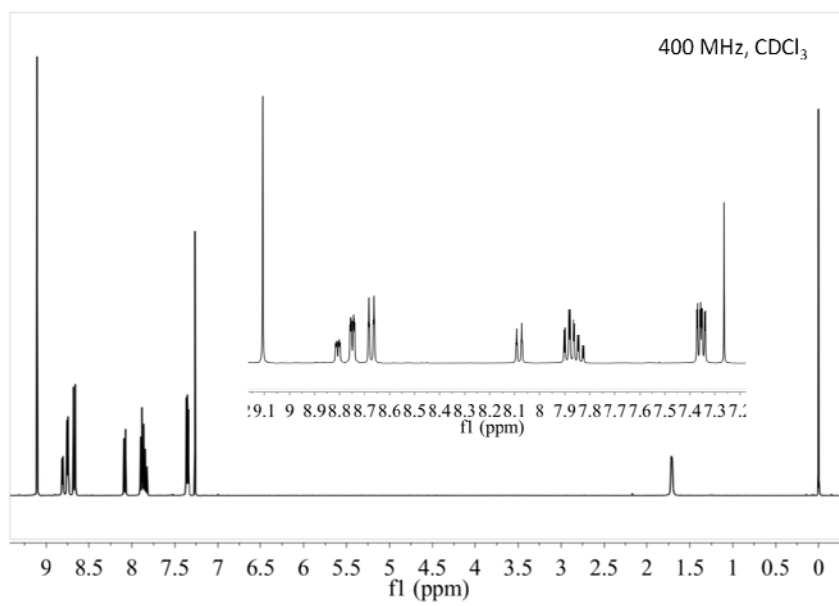

**Fig. S4.** <sup>1</sup>H NMR spectra of L1 (top) and L2 (bottom).

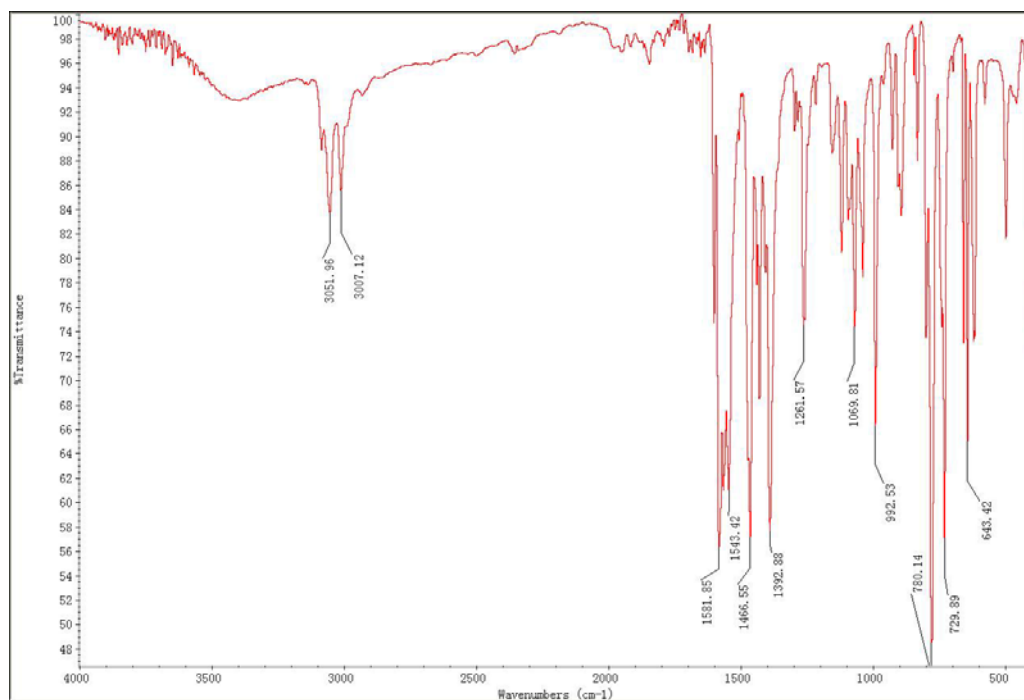

(a) L1

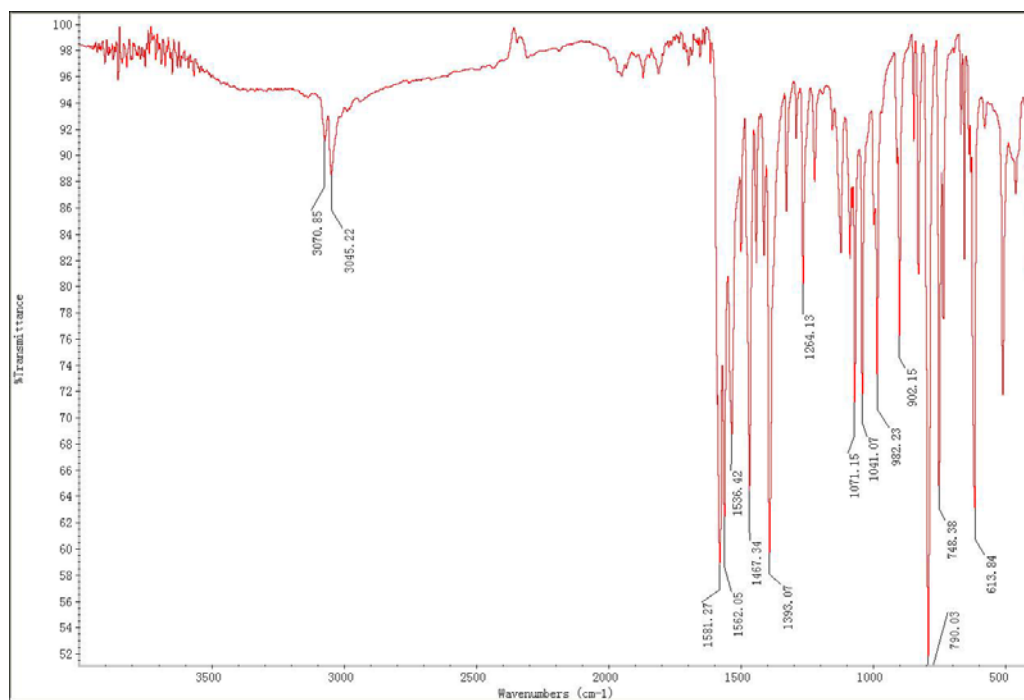

(b) L2

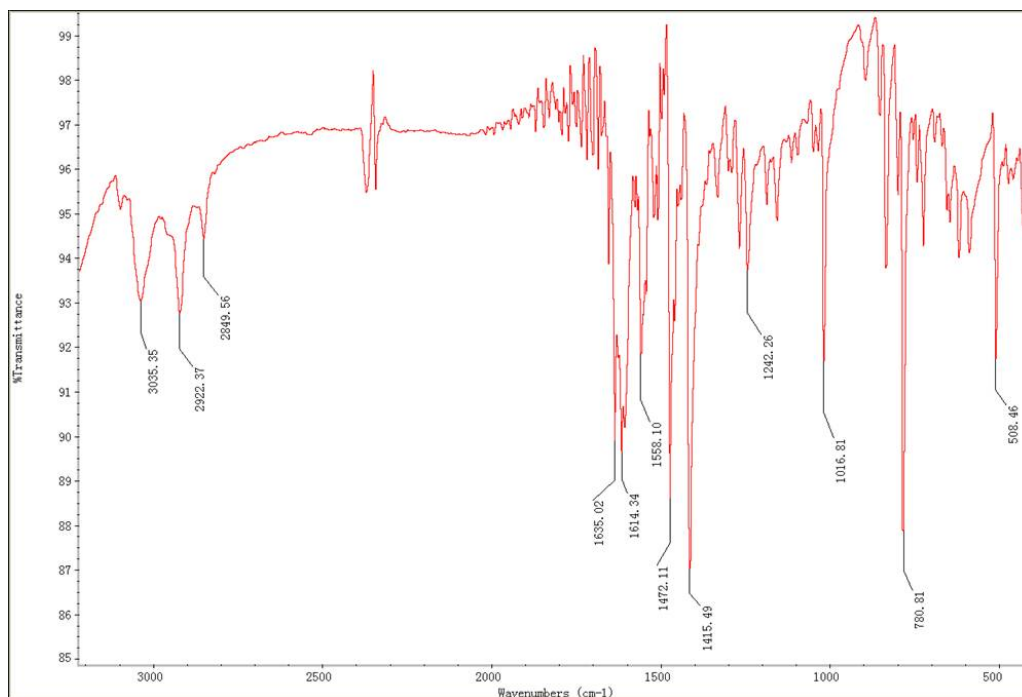

(c) complex 1

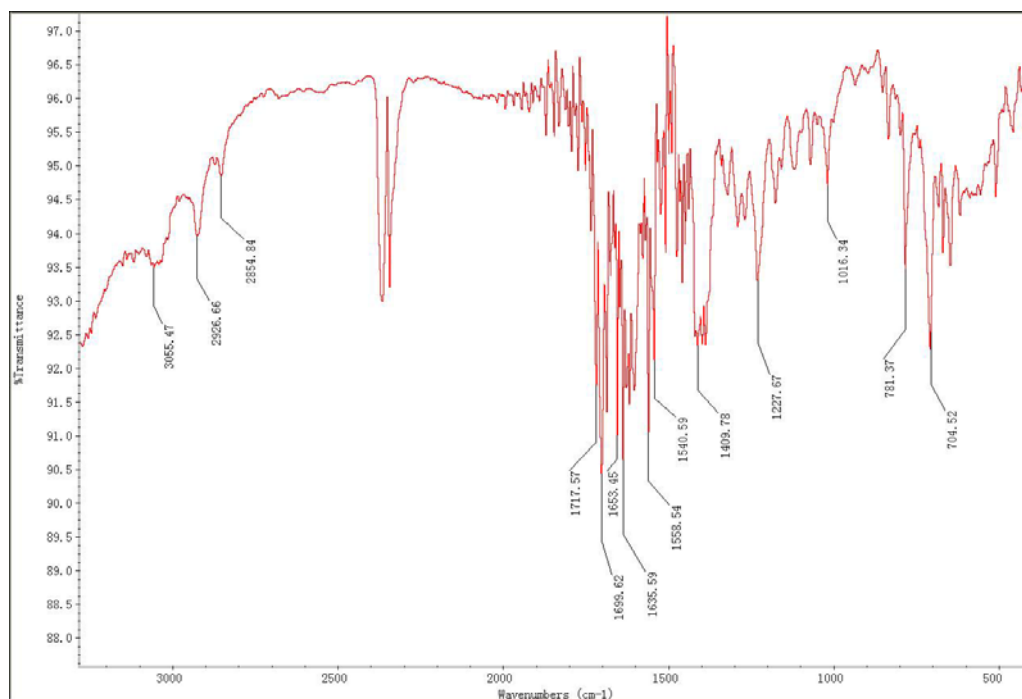

(d) complex 2

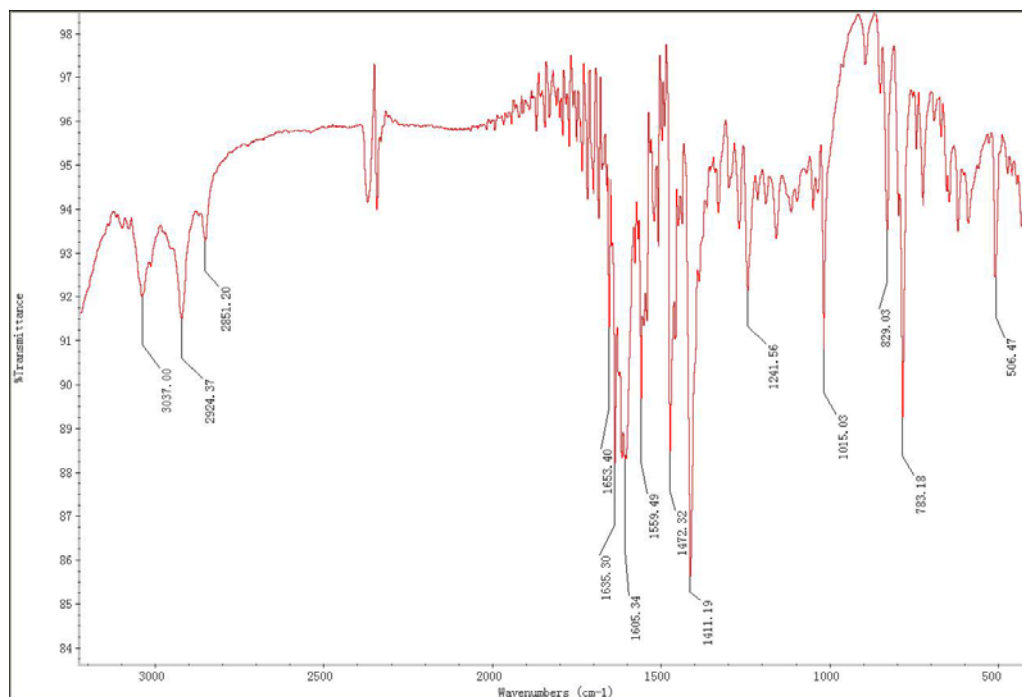

(e) complex 3

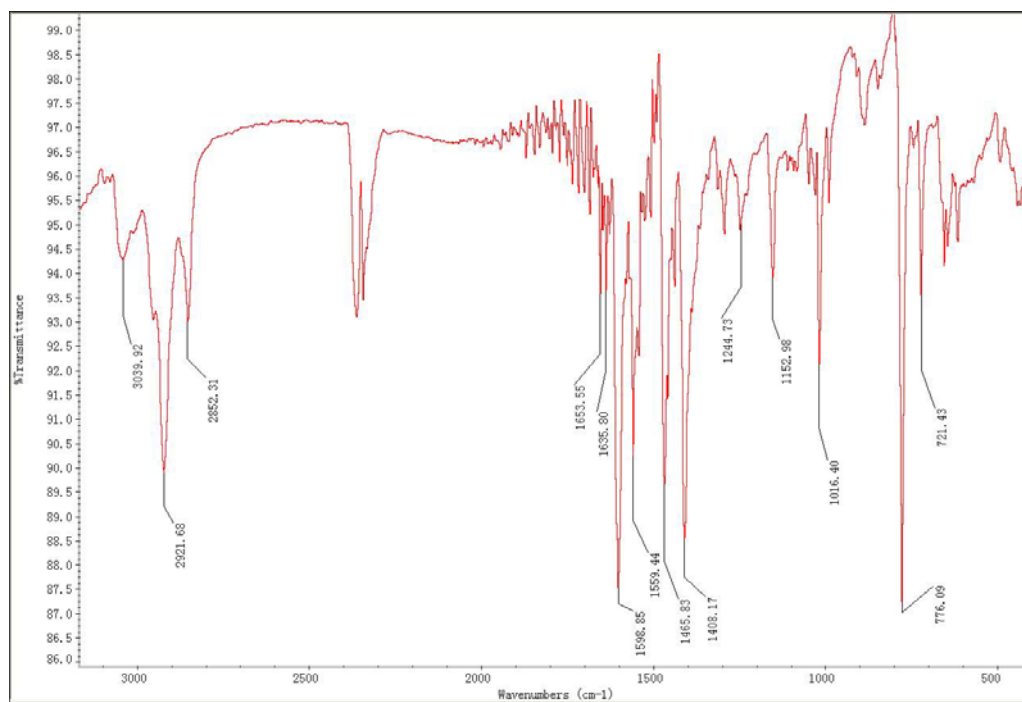

(f) complex 4

Fig. S5. IR spectra of ligands and complexes.
